# Supplementary material for: Structural Analysis of Botulinum Neurotoxins Type B and E by Cryo-EM
Source: MDPI journal article supplement (doi:10.3390/toxins14010014), 2021-12-23
Supplement: s1 [file s1]

# Supplementary Materials: Structural Analysis of Botulinum Neurotoxins Type B and E by cryo-EM

Sara Košenina, Markel Martínez-Carranza, Jonathan R. Davies, Geoffrey Masuyer and Pål Stenmark

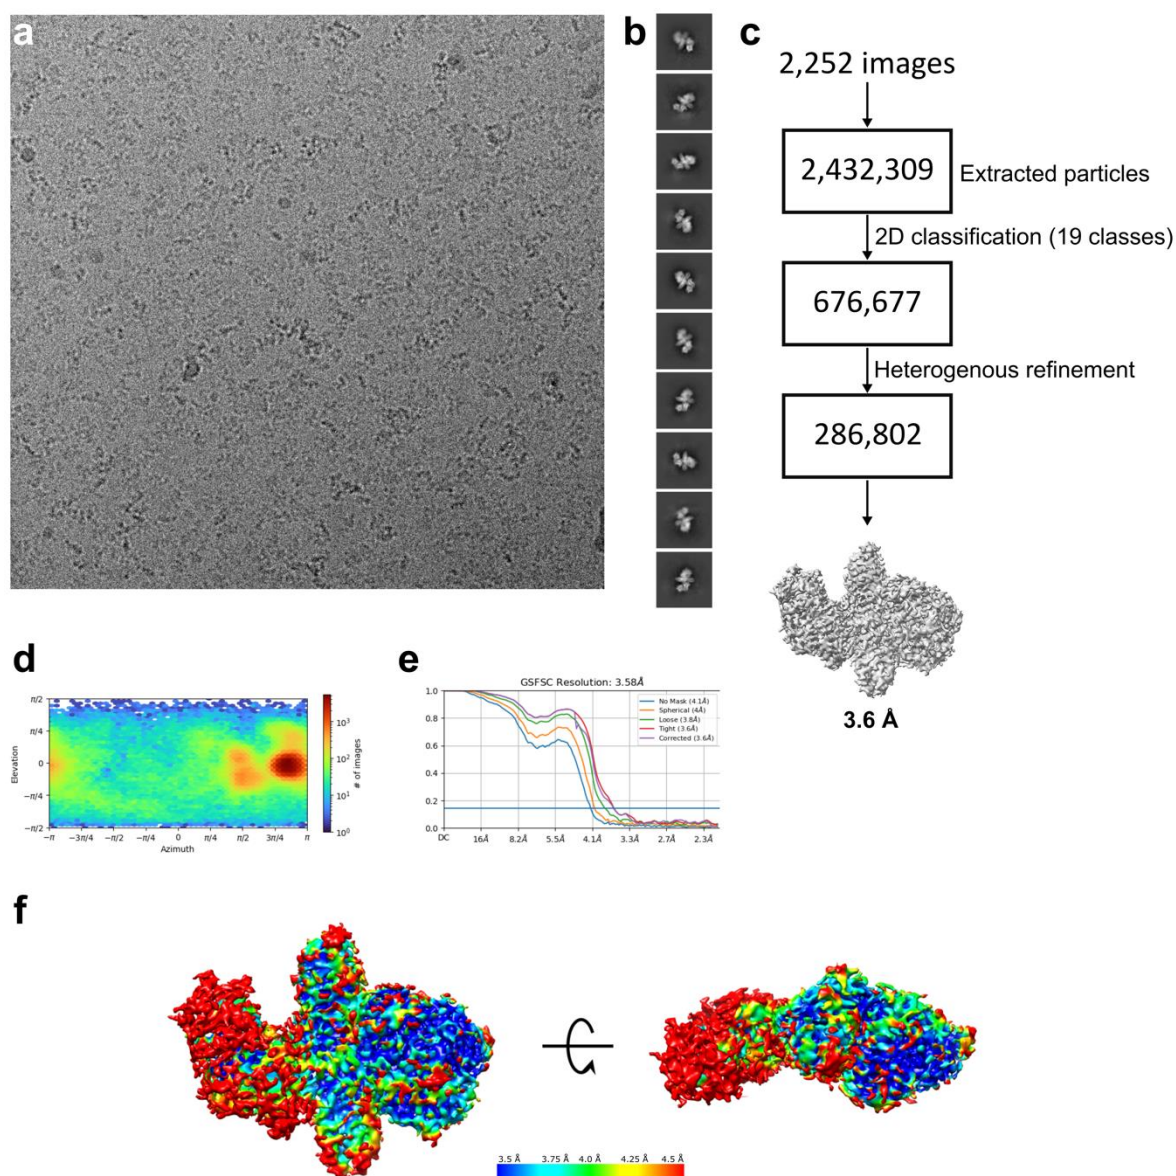

**Figure S1. Image processing and evaluation of BoNT/B dataset.** (a) Representative micrograph from a dataset of 2252 images. (b) Representative 2D class averages showing a range of angular orientations. (c) Image processing pipeline for BoNT/B, numbers indicate number of particles selected for each reconstruction step. (d) Reconstruction and corresponding angular distribution map, indicating BoNT/B has a strong preferred orientation. (e) Fourier shell correlation (FSC) curves. (f) EM density coloured by local resolution (colour bar indicates local resolution in Å).

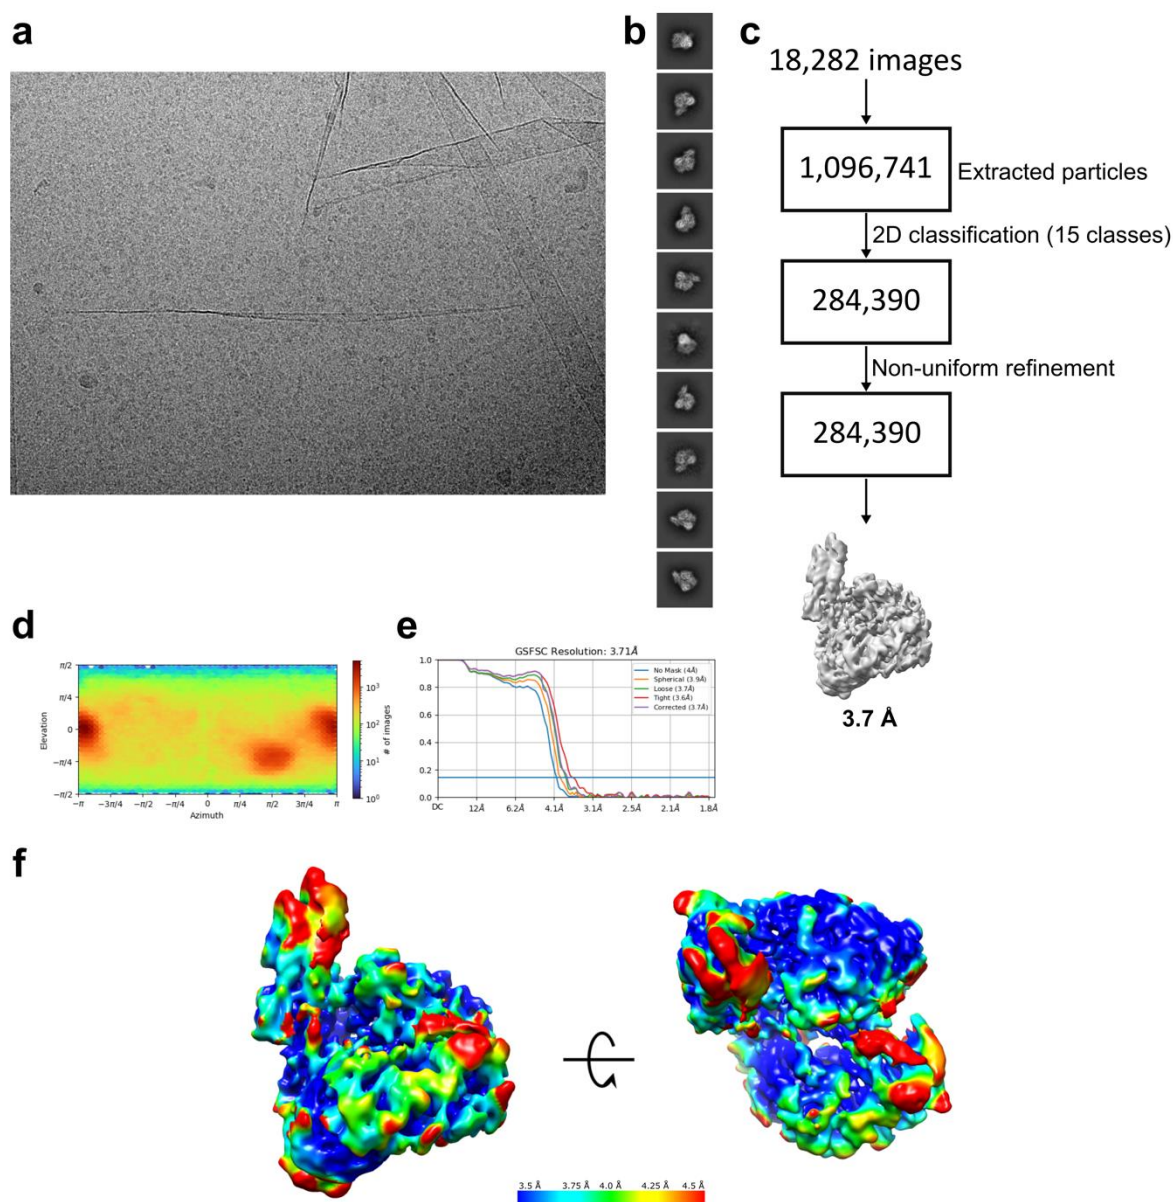

**Figure S2. Image processing and evaluation of BoNT/E dataset.** (a) Representative micrograph from a dataset of 18282 images. (b) Representative 2D class averages showing a range of angular orientations. (c) Image processing pipeline for BoNT/E, numbers indicate number of particles selected for each reconstruction step. (d) Reconstruction and corresponding angular distribution map, indicating BoNT/B has a strong preferred orientation. (e) Fourier shell correlation (FSC) curves. (f) EM density coloured by local resolution (colour bar indicates local resolution in Å).

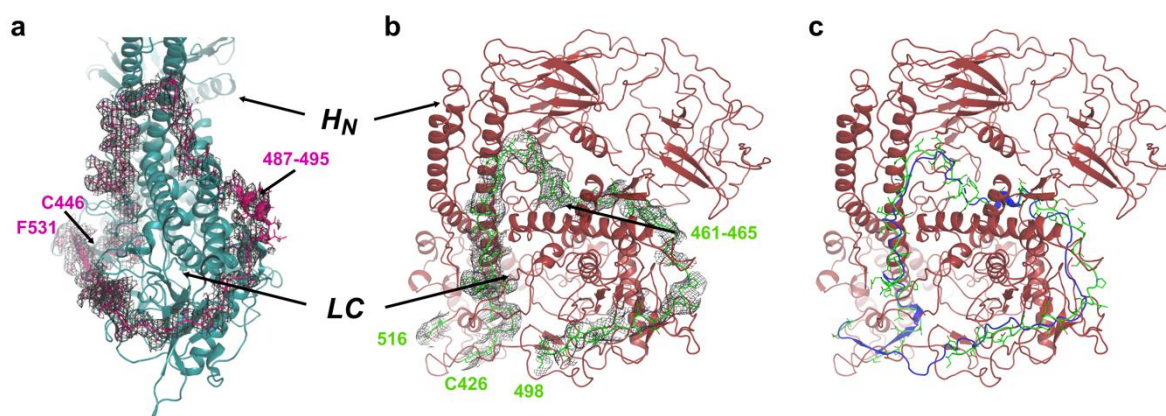

**Figure S3. Belt region.** (a) 3D reconstruction of BoNT/B (teal) and (b-c) BoNT/E (red), showing cryo-EM maps around the belt region (in pink and green for /B and /E respectively). Residues 499-515 of BoNT/E could not be modeled. In (c) the belt region of the crystal structure is shown in blue (PDB 3FFZ).

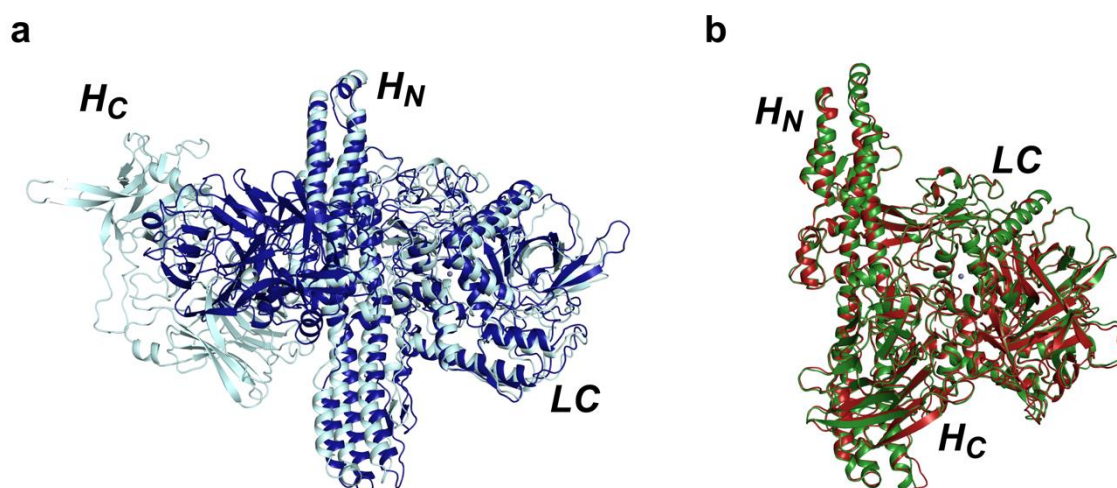

**Figure S4. AlphaFold model predictions.** (a) Superposition of the X-ray crystal structure (cyan) and the AlphaFold-predicted model (blue) of BoNT/B. (b) Superposition of the X-ray crystal structure (red) and the AlphaFold-predicted model (green) of BoNT/E. Prediction models were downloaded from the AlphaFold Protein Structure Database [<https://alphafold.ebi.ac.uk/entry/B1INP5>, and <https://alphafold.ebi.ac.uk/entry/Q00496>].
